# Supplementary material for: PICK1 links Argonaute 2 to endosomes in neuronal dendrites and regulates miRNA activity
Source: PubMed Central journal article supplement (PMC4210090; doi:10.1002/embr.201337631), 2014-04-10
Supplement: embr0015-0548-sd1.pdf [file embr0015-0548-sd1.pdf]

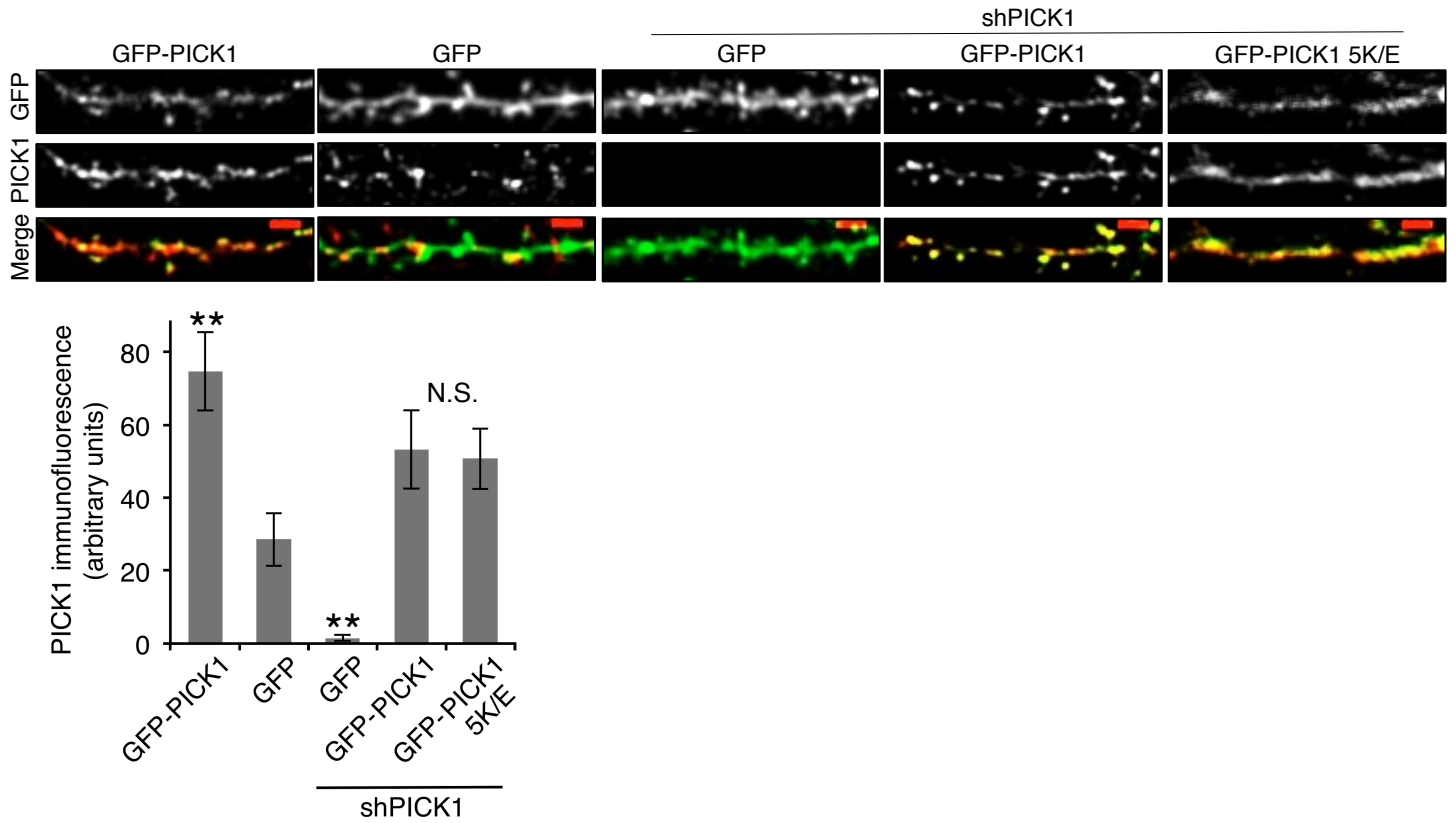

### Supplementary Figure S1

Characterisation of PICK1 knockdown, rescue and overexpression.

Neurons expressing GFP, GFP-PICK1 or GFP-PICK1 5K/E with or without PICK1 shRNA as shown were stained for PICK1 (red channel). Graph shows mean PICK1 immunofluorescence intensity per cell. \*\* $p < 0.01$ , relative to GFP control (t-test, with Bonferroni correction),  $n = 5$  cells per condition.
