# Supplementary material for: PICK1 links Argonaute 2 to endosomes in neuronal dendrites and regulates miRNA activity
Source: PubMed Central journal article supplement (PMC4210090; doi:10.1002/embr.201337631), 2014-04-10
Supplement: embr0015-0548-sd2.pdf [file embr0015-0548-sd2.pdf]

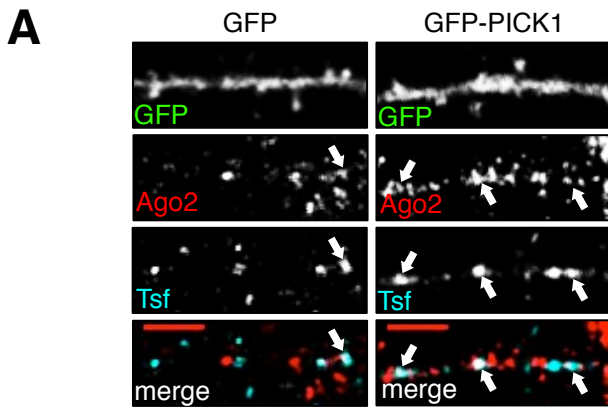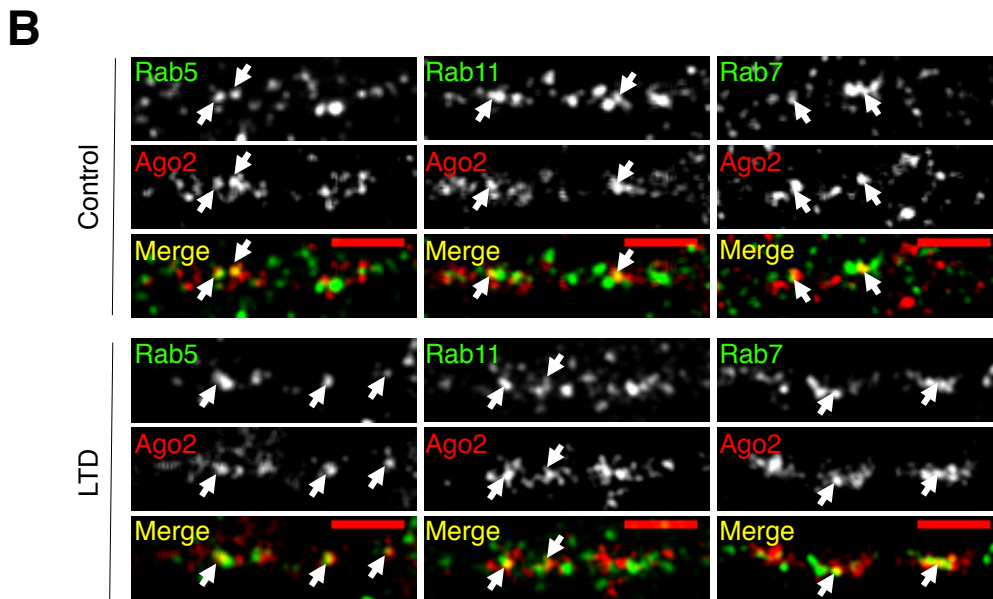

Supplementary Figure S2

- A) Representative images for Figure 3C. Neurons expressing GFP or GFP-PICK1 were incubated with Alexa-conjugated transferrin (Tfn, cyan) and stained for Ago2 (red). Bottom panels show the merge of Ago2 and Tfn channels. Scale bars 5 $\mu$ m.
- B) Representative images for Figure 4E. Neurons were treated for chemical LTD and stained with Ago2 (red) and Rab proteins (green). Scale bars 5 $\mu$ m.
