# Supplementary material for: PICK1 links Argonaute 2 to endosomes in neuronal dendrites and regulates miRNA activity
Source: PubMed Central journal article supplement (PMC4210090; doi:10.1002/embr.201337631), 2014-04-10

CTRL

PICK1

Ago2

TTX

Bic

LTD

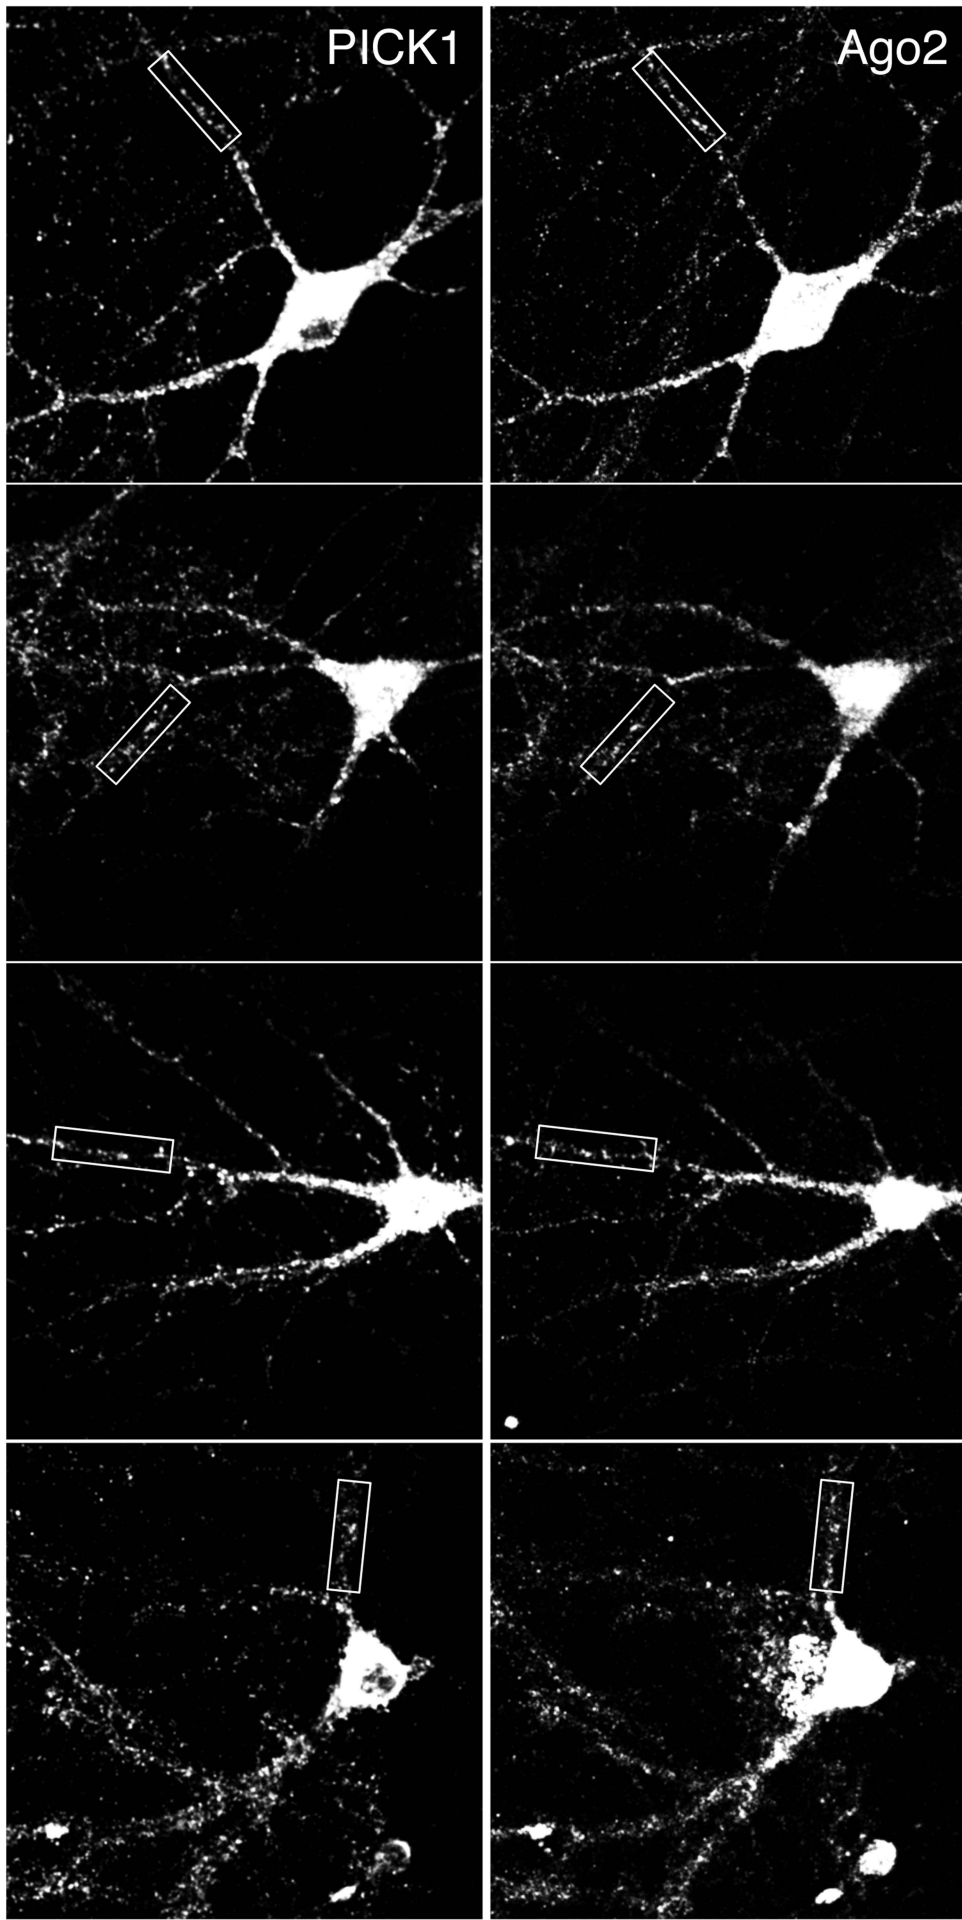

Supplement: embr0015-0548-sd6.pdf [file embr0015-0548-sd6.pdf]
